# Supplementary material for: Diagnosis of Progressive Disseminated Histoplasmosis in Advanced HIV: A Meta-Analysis of Assay Analytical Performance
Source: MDPI journal article supplement (doi:10.3390/jof5030076), 2019-08-18
Supplement: s1 [file s1]

## Search for histoplasmosis, HIV, and antigen testing

| Database                   | Strategy                                                                                                                                                                                                                                                                                                                                                                                                                                                                                                                                                                                                                                                                                                                                                         | Run Date | Records                                                              |
|----------------------------|------------------------------------------------------------------------------------------------------------------------------------------------------------------------------------------------------------------------------------------------------------------------------------------------------------------------------------------------------------------------------------------------------------------------------------------------------------------------------------------------------------------------------------------------------------------------------------------------------------------------------------------------------------------------------------------------------------------------------------------------------------------|----------|----------------------------------------------------------------------|
| Medline<br>(Ovid)<br>1946- | <p>(histoplasmos* OR histoplasma).mp. OR exp Histoplasmosis/</p> <p>AND</p> <p>(hiv OR human immunodeficiency virus OR aids OR acquired immunodeficiency syndrome OR immunodeficiency).mp. OR exp HIV/ OR exp Acquired Immunodeficiency Syndrome/</p> <p>AND</p> <p>(antigen* OR immune complex* OR autoantigen* OR epitope* OR isoantigen* OR superantigen* OR allergen* OR histoplasmin OR serolog* OR serum* OR blood OR plasma OR marrow* OR mycolog* OR PCR OR polymerase chain reaction*).mp. OR exp Antigens/ OR exp Blood/ OR exp Bone Marrow/ OR exp Serology/ OR exp Mycology/ OR exp Polymerase Chain Reaction/</p> <p>AND</p> <p>(sensitiv* OR diagnos* OR predictive value*).mp. OR accurac*.ti,ab.</p> <p>Limits: English, Spanish, Portuguese</p> | 2/20/19  | 366 articles                                                         |
| Embase<br>(Ovid)<br>1947-  | <p>(histoplasmos* OR histoplasma).mp. OR exp histoplasmosis/</p> <p>AND</p> <p>(hiv OR human immunodeficiency virus OR aids OR acquired immunodeficiency syndrome OR immunodeficiency).mp. OR exp Human immunodeficiency virus/ OR exp acquired immune deficiency syndrome/</p> <p>AND</p> <p>(antigen* OR immune complex* OR autoantigen* OR epitope* OR isoantigen* OR superantigen* OR allergen* OR histoplasmin OR serolog* OR serum* OR blood OR plasma OR marrow* OR mycolog* OR PCR OR polymerase chain reaction*).mp. OR exp antigen/ OR exp blood/ OR exp bone marrow/ OR exp serology/ OR exp mycology/ OR exp polymerase chain reaction/</p> <p>AND</p>                                                                                               | 2/20/19  | <p>1028 articles</p> <p>-303<br/>duplicates</p> <p>=725 articles</p> |

|                                           |                                                                                                                                                                                                                                                                                                                                                                                                                                                                                                                                                                                                                                                                                                                                                                                                                                                  |                |                                                                    |
|-------------------------------------------|--------------------------------------------------------------------------------------------------------------------------------------------------------------------------------------------------------------------------------------------------------------------------------------------------------------------------------------------------------------------------------------------------------------------------------------------------------------------------------------------------------------------------------------------------------------------------------------------------------------------------------------------------------------------------------------------------------------------------------------------------------------------------------------------------------------------------------------------------|----------------|--------------------------------------------------------------------|
|                                           | <p>(sensitiv* OR diagnos* OR predictive value*).mp.<br/>OR accurac*.ti,ab.</p> <p>Limits: English, Spanish, Portuguese</p>                                                                                                                                                                                                                                                                                                                                                                                                                                                                                                                                                                                                                                                                                                                       |                |                                                                    |
| <p>CAB Abstracts<br/>(Ovid)<br/>1910-</p> | <p>(histoplasmos* OR histoplasma).mp. OR exp<br/>histoplasmosis/</p> <p>AND</p> <p>(hiv OR human immunodeficiency virus OR aids OR<br/>acquired immunodeficiency syndrome OR<br/>immunodeficiency).mp. OR exp human<br/>immunodeficiency viruses/ OR exp acquired<br/>immune deficiency syndrome/</p> <p>AND</p> <p>(antigen* OR immune complex* OR autoantigen*<br/>OR epitope* OR isoantigen* OR superantigen* OR<br/>allergen* OR histoplasmin OR serolog* OR serum*<br/>OR blood OR plasma OR marrow* OR mycolog* OR<br/>PCR OR polymerase chain reaction*).mp. OR exp<br/>antigens/ OR exp blood/ OR exp bone marrow/ OR<br/>exp serology/ OR exp mycology/ OR exp<br/>polymerase chain reaction/</p> <p>AND</p> <p>(sensitiv* OR diagnos* OR predictive value*).mp.<br/>OR accurac*.ti,ab.</p> <p>Limits: English, Spanish, Portuguese</p> | <p>2/20/19</p> | <p>270 articles</p> <p>-197<br/>duplicates</p> <p>=73 articles</p> |
| <p>Global Health<br/>(Ovid)<br/>1910-</p> | <p>(histoplasmos* OR histoplasma).mp. OR exp<br/>histoplasmosis/</p> <p>AND</p> <p>(hiv OR human immunodeficiency virus OR aids OR<br/>acquired immunodeficiency syndrome OR<br/>immunodeficiency).mp. OR exp human<br/>immunodeficiency viruses/ OR exp acquired<br/>immune deficiency syndrome/</p> <p>AND</p> <p>(antigen* OR immune complex* OR autoantigen*<br/>OR epitope* OR isoantigen* OR superantigen* OR<br/>allergen* OR histoplasmin OR serolog* OR serum*<br/>OR blood OR plasma OR marrow* OR mycolog* OR<br/>PCR OR polymerase chain reaction*).mp. OR exp<br/>antigens/ OR exp blood/ OR exp bone marrow/ OR<br/>exp serology/ OR exp mycology/ OR exp<br/>polymerase chain reaction/</p>                                                                                                                                       | <p>2/20/19</p> | <p>273 articles</p> <p>-195<br/>duplicates</p> <p>=2 articles</p>  |

|                              |                                                                                                                                                                                                                                                                                                                                                                                                                                                                                                                                                                                                                                                                                                                                                                                                                                                                                                                                                                                                                                                                                                                                                                                                                                                                   |         |                                                                    |
|------------------------------|-------------------------------------------------------------------------------------------------------------------------------------------------------------------------------------------------------------------------------------------------------------------------------------------------------------------------------------------------------------------------------------------------------------------------------------------------------------------------------------------------------------------------------------------------------------------------------------------------------------------------------------------------------------------------------------------------------------------------------------------------------------------------------------------------------------------------------------------------------------------------------------------------------------------------------------------------------------------------------------------------------------------------------------------------------------------------------------------------------------------------------------------------------------------------------------------------------------------------------------------------------------------|---------|--------------------------------------------------------------------|
|                              | <p>AND</p> <p>(sensitiv* OR diagnos* OR predictive value*).mp.<br/>OR accurac*.ti,ab.</p> <p>Limits: English, Spanish, Portuguese</p>                                                                                                                                                                                                                                                                                                                                                                                                                                                                                                                                                                                                                                                                                                                                                                                                                                                                                                                                                                                                                                                                                                                             |         |                                                                    |
| Scopus<br>1960-              | <p>TITLE-ABS-KEY ( histoplasmos* OR histoplasma )<br/>AND TITLE-ABS-KEY ( hiv OR "human<br/>immunodeficiency virus" OR aids OR "acquired<br/>immunodeficiency syndrome" OR<br/>immunodeficiency ) AND TITLE-ABS-KEY(antigen*<br/>OR "immune complex" OR autoantigen* OR<br/>epitope* OR isoantigen* OR superantigen* OR<br/>allergen* OR histoplasmin OR serolog* OR serum*<br/>OR blood OR plasma OR marrow* OR mycolog* OR<br/>PCR OR "polymerase chain reaction") AND ( TITLE-ABS-KEY ( sensitiv* OR diagnos* OR<br/>"predictive value" ) OR TITLE-ABS ( accurac* ))<br/>AND ( LIMIT-TO ( LANGUAGE , "English" ) OR<br/>LIMIT-TO ( LANGUAGE , "Spanish" ) OR LIMIT-<br/>TO ( LANGUAGE , "Portuguese" ) )</p>                                                                                                                                                                                                                                                                                                                                                                                                                                                                                                                                                   | 2/20/19 | <p>584 articles</p> <p>-554<br/>duplicates</p> <p>=31 articles</p> |
| Cochrane<br>Library<br>1800- | <p>#1(histoplasmos* OR histoplasma):ti,ab,kwLimits<br/>93<br/>#2MeSH descriptor: [Histoplasmosis] explode all<br/>treesMeSH 42<br/>#3MeSH descriptor: [HIV] explode all treesMeSH<br/>2896<br/>#4MeSH descriptor: [Acquired Immunodeficiency<br/>Syndrome] explode all treesMeSH 1709<br/>#5( hiv OR "human immunodeficiency virus" OR<br/>aids OR "acquired immunodeficiency syndrome"<br/>OR immunodeficiency ):ti,ab,kwLimits 23558<br/>#6(sensitiv* OR diagnos* OR "predictive<br/>value"):ti,ab,kwLimits 201636<br/>#7(accurac*):ti,abLimits 13660<br/>#8(antigen* OR "immune complex" OR<br/>autoantigen* OR epitope* OR isoantigen* OR<br/>superantigen* OR allergen* OR histoplasmin OR<br/>serolog* OR serum* OR blood OR plasma OR<br/>marrow* OR mycolog* OR PCR OR "polymerase<br/>chain reaction"):ti,ab,kwLimits 342426<br/>#9MeSH descriptor: [Antigens] explode all<br/>treesMeSH 13620<br/>#10MeSH descriptor: [Blood] explode all<br/>treesMeSH 15019<br/>#11MeSH descriptor: [Bone Marrow] explode all<br/>treesMeSH 595<br/>#12MeSH descriptor: [Serology] explode all<br/>treesMeSH 5<br/>#13MeSH descriptor: [Mycology] explode all<br/>treesMeSH 10<br/>#14MeSH descriptor: [Polymerase Chain Reaction]<br/>explode all treesMeSH 2171</p> | 2/20/19 | <p>7 articles</p> <p>-6 duplicates</p> <p>=1 article</p>           |

|                                             |                                                                                                                                                                                                                                                                                                                                                                                                                                                                                                                                                                                                                                                                                                                                                                                                                                                                                                                                                                                                                                                                                                                                                                                                                                                                                                                                                                                                                                                                                                                                                                                                                                                                                                                                                                                                                                                                                                                                                                                                                                                                                                                                                                                                                                                               |                |                                                                   |
|---------------------------------------------|---------------------------------------------------------------------------------------------------------------------------------------------------------------------------------------------------------------------------------------------------------------------------------------------------------------------------------------------------------------------------------------------------------------------------------------------------------------------------------------------------------------------------------------------------------------------------------------------------------------------------------------------------------------------------------------------------------------------------------------------------------------------------------------------------------------------------------------------------------------------------------------------------------------------------------------------------------------------------------------------------------------------------------------------------------------------------------------------------------------------------------------------------------------------------------------------------------------------------------------------------------------------------------------------------------------------------------------------------------------------------------------------------------------------------------------------------------------------------------------------------------------------------------------------------------------------------------------------------------------------------------------------------------------------------------------------------------------------------------------------------------------------------------------------------------------------------------------------------------------------------------------------------------------------------------------------------------------------------------------------------------------------------------------------------------------------------------------------------------------------------------------------------------------------------------------------------------------------------------------------------------------|----------------|-------------------------------------------------------------------|
|                                             | <p>#15#1 OR #2Limits 93<br/> #16#3 OR #4 OR #5Limits 23558<br/> #17#6 OR #7Limits 207398<br/> #18#8 OR #9 OR #10 OR #11 OR #12 OR #13 OR<br/> #14Limits 345397<br/> #19#15 AND #16 AND #17 AND #18Limits 7</p> <p>Limits: English, Spanish, Portuguese</p>                                                                                                                                                                                                                                                                                                                                                                                                                                                                                                                                                                                                                                                                                                                                                                                                                                                                                                                                                                                                                                                                                                                                                                                                                                                                                                                                                                                                                                                                                                                                                                                                                                                                                                                                                                                                                                                                                                                                                                                                    |                |                                                                   |
| <p>PubMed<br/> Central (PMC)<br/> 2000-</p> | <p>(((((((((histoplasmos*[Abstract] OR<br/> histoplasma[Abstract]))) OR (histoplasmos*[Title]<br/> OR histoplasma[Title]))) OR "histoplasmosis"[MeSH<br/> Terms])) AND (((hiv [Abstract] OR "human<br/> immunodeficiency virus" [Abstract] OR aids<br/> [Abstract] OR "acquired immunodeficiency<br/> syndrome" [Abstract] OR<br/> immunodeficiency[Abstract])) OR (hiv [Title] OR<br/> "human immunodeficiency virus" [Title] OR aids<br/> [Title] OR "acquired immunodeficiency syndrome"<br/> [Title] OR immunodeficiency[Title])) OR<br/> ("hiv"[MeSH Terms] OR "acquired<br/> immunodeficiency syndrome"[MeSH Terms])) AND<br/> (((sensitiv*[Abstract] OR diagnos*[Abstract]<br/> OR "predictive value"[Abstract] OR<br/> accurac*[Abstract])) OR (sensitiv*[Title] OR<br/> diagnos*[Title] OR "predictive value"[Title] OR<br/> accurac*[Title])) AND (((antigen*[Abstract] OR<br/> "immune complex"[Abstract] OR<br/> autoantigen*[Abstract] OR epitope*[Abstract] OR<br/> isoantigen*[Abstract] OR superantigen*[Abstract]<br/> OR allergen*[Abstract] OR histoplasmin[Abstract]<br/> OR serolog*[Abstract] OR serum*[Abstract] OR<br/> blood[Abstract] OR plasma[Abstract] OR<br/> marrow*[Abstract] OR mycolog*[Abstract] OR<br/> PCR[Abstract] OR "polymerase chain<br/> reaction"[Abstract])) OR (antigen*[Title] OR<br/> "immune complex"[Title] OR autoantigen*[Title]<br/> OR epitope*[Title] OR isoantigen*[Title] OR<br/> superantigen*[Title] OR allergen*[Title] OR<br/> histoplasmin[Title] OR serolog*[Title] OR<br/> serum*[Title] OR blood[Title] OR plasma[Title] OR<br/> marrow*[Title] OR mycolog*[Title] OR PCR[Title]<br/> OR "polymerase chain reaction"[Title])) OR<br/> ("Antigens"[Mesh] OR "Blood"[Mesh] OR "Bone<br/> Marrow"[Mesh] OR "Mycology"[Mesh] OR<br/> "Serology"[Mesh] OR "Polymerase Chain<br/> Reaction"[Mesh])) NOT<br/> (((((((((((histoplasmos*[Abstract] OR<br/> histoplasma[Abstract]))) OR (histoplasmos*[Title]<br/> OR histoplasma[Title]))) OR "histoplasmosis"[MeSH<br/> Terms])) AND (((hiv [Abstract] OR "human<br/> immunodeficiency virus" [Abstract] OR aids<br/> [Abstract] OR "acquired immunodeficiency<br/> syndrome" [Abstract] OR<br/> immunodeficiency[Abstract])) OR (hiv [Title] OR</p> | <p>2/20/19</p> | <p>12 articles<br/><br/> -10 duplicates<br/><br/> =2 articles</p> |

|        |                                                                                                                                                                                                                                                                                                                                                                                                                                                                                                                                                                                                                                                                                                                                                                                                                                                                                                                                                                                                                                                                                                                                                                                                                                                                                                                                                               |                                  |                                                              |
|--------|---------------------------------------------------------------------------------------------------------------------------------------------------------------------------------------------------------------------------------------------------------------------------------------------------------------------------------------------------------------------------------------------------------------------------------------------------------------------------------------------------------------------------------------------------------------------------------------------------------------------------------------------------------------------------------------------------------------------------------------------------------------------------------------------------------------------------------------------------------------------------------------------------------------------------------------------------------------------------------------------------------------------------------------------------------------------------------------------------------------------------------------------------------------------------------------------------------------------------------------------------------------------------------------------------------------------------------------------------------------|----------------------------------|--------------------------------------------------------------|
|        | <p>"human immunodeficiency virus" [Title] OR aids [Title] OR "acquired immunodeficiency syndrome" [Title] OR immunodeficiency[Title])) OR ("hiv"[MeSH Terms] OR "acquired immunodeficiency syndrome"[MeSH Terms])) AND (((sensitivity*[Abstract] OR diagnosis*[Abstract] OR "predictive value"[Abstract] OR accuracy*[Abstract])) OR (sensitivity*[Title] OR diagnosis*[Title] OR "predictive value"[Title] OR accuracy*[Title])) AND (((antigen*[Abstract] OR "immune complex"[Abstract] OR autoantigen*[Abstract] OR epitope*[Abstract] OR isoantigen*[Abstract] OR superantigen*[Abstract] OR allergen*[Abstract] OR histoplasmin[Abstract] OR serology*[Abstract] OR serum*[Abstract] OR blood[Abstract] OR plasma[Abstract] OR marrow*[Abstract] OR mycology*[Abstract] OR PCR[Abstract] OR "polymerase chain reaction"[Abstract])) OR (antigen*[Title] OR "immune complex"[Title] OR autoantigen*[Title] OR epitope*[Title] OR isoantigen*[Title] OR superantigen*[Title] OR allergen*[Title] OR histoplasmin[Title] OR serology*[Title] OR serum*[Title] OR blood[Title] OR plasma[Title] OR marrow*[Title] OR mycology*[Title] OR PCR[Title] OR "polymerase chain reaction"[Title])) OR ("Antigens"[Mesh] OR "Blood"[Mesh] OR "Bone Marrow"[Mesh] OR "Mycology"[Mesh] OR "Serology"[Mesh] OR "Polymerase Chain Reaction"[Mesh])) AND medline[sb])</p> |                                  |                                                              |
| LILACS | <p>(tw:(histoplasmos* OR histoplasma )) AND (tw:(hiv OR "human immunodeficiency virus" OR aids OR "acquired immunodeficiency syndrome" OR immunodeficiency )) AND (tw:(sensitivity* OR diagnosis* OR "predictive value" OR accuracy*)) AND (tw:(antigen* OR "immune complex" OR autoantigen* OR epitope* OR isoantigen* OR superantigen* OR allergen* OR histoplasmin OR serology* OR serum* OR blood OR plasma OR marrow* OR mycology* OR PCR OR "polymerase chain reaction"))</p> <p>Limits: LILACS, English, Spanish, Portuguese</p>                                                                                                                                                                                                                                                                                                                                                                                                                                                                                                                                                                                                                                                                                                                                                                                                                       | 2/20/19                          | <p>70 articles</p> <p>-11 duplicates</p> <p>=59 articles</p> |
|        |                                                                                                                                                                                                                                                                                                                                                                                                                                                                                                                                                                                                                                                                                                                                                                                                                                                                                                                                                                                                                                                                                                                                                                                                                                                                                                                                                               | <b>De-duplicated in EndNote:</b> | <b>1259 articles</b>                                         |

## Broad search on histoplasmosis, HIV, and diagnosis

\*Diagnostic methodology search filter adapted from:

Haynes RB, Wilczynski NL. Optimal search strategies for retrieving scientifically strong studies of diagnosis from MEDLINE: analytical survey. BMJ. 2004; 328:1040-2.

| Database                         | Strategy                                                                                                                                                                                                                                                                                                                                                                                                          | Run Date | Records                                                           |
|----------------------------------|-------------------------------------------------------------------------------------------------------------------------------------------------------------------------------------------------------------------------------------------------------------------------------------------------------------------------------------------------------------------------------------------------------------------|----------|-------------------------------------------------------------------|
| Medline<br>(Ovid)<br>1946-       | <p>(histoplasmos* OR histoplasma).mp. OR exp Histoplasmosis/</p> <p>AND</p> <p>(hiv OR human immunodeficiency virus OR aids OR acquired immunodeficiency syndrome OR immunodeficiency).mp. OR exp HIV/ OR exp Acquired Immunodeficiency Syndrome/</p> <p>AND</p> <p>(sensitiv* OR diagnos* OR predictive value*).mp. OR accurac*.ti,ab.</p> <p>Limits: English, Spanish, Portuguese</p>                           | 2/20/19  | 870 articles                                                      |
| Embase<br>(Ovid)<br>1947-        | <p>(histoplasmos* OR histoplasma).mp. OR exp histoplasmosis/</p> <p>AND</p> <p>(hiv OR human immunodeficiency virus OR aids OR acquired immunodeficiency syndrome OR immunodeficiency).mp. OR exp Human immunodeficiency virus/ OR exp acquired immune deficiency syndrome/</p> <p>AND</p> <p>(sensitiv* OR diagnos* OR predictive value*).mp. OR accurac*.ti,ab.</p> <p>Limits: English, Spanish, Portuguese</p> | 2/20/19  | <p>1701 articles</p> <p>-724 duplicates</p> <p>=977 articles</p>  |
| CAB Abstracts<br>(Ovid)<br>1910- | <p>(histoplasmos* OR histoplasma).mp. OR exp histoplasmosis/</p> <p>AND</p> <p>(hiv OR human immunodeficiency virus OR aids OR acquired immunodeficiency syndrome OR immunodeficiency).mp. OR exp human immunodeficiency viruses/ OR exp acquired immune deficiency syndrome/</p> <p>AND</p>                                                                                                                      | 2/20/19  | <p>507 articles</p> <p>- 375 duplicates</p> <p>= 132 articles</p> |

|                                  |                                                                                                                                                                                                                                                                                                                                                                                                                                                                                                                                                                                                                                                                                                           |         |                                                                |
|----------------------------------|-----------------------------------------------------------------------------------------------------------------------------------------------------------------------------------------------------------------------------------------------------------------------------------------------------------------------------------------------------------------------------------------------------------------------------------------------------------------------------------------------------------------------------------------------------------------------------------------------------------------------------------------------------------------------------------------------------------|---------|----------------------------------------------------------------|
|                                  | (sensitiv* OR diagnos* OR predictive value*).mp.<br>OR accurac*.ti,ab.<br><br>Limits: English, Spanish, Portuguese                                                                                                                                                                                                                                                                                                                                                                                                                                                                                                                                                                                        |         |                                                                |
| Global Health<br>(Ovid)<br>1910- | (histoplasmos* OR histoplasma).mp. OR exp<br>histoplasmosis/<br><br>AND<br><br>(hiv OR human immunodeficiency virus OR aids OR<br>acquired immunodeficiency syndrome OR<br>immunodeficiency).mp. OR exp human<br>immunodeficiency viruses/ OR exp acquired<br>immune deficiency syndrome/<br><br>AND<br><br>(sensitiv* OR diagnos* OR predictive value*).mp.<br>OR accurac*.ti,ab.<br><br>Limits: English, Spanish, Portuguese                                                                                                                                                                                                                                                                            | 2/20/19 | 522 articles<br><br>- 514<br>duplicates<br><br>= 8 articles    |
| Scopus<br>1960-                  | TITLE-ABS-KEY ( histoplasmos* OR histoplasma )<br>AND TITLE-ABS-KEY ( hiv OR "human<br>immunodeficiency virus" OR aids OR "acquired<br>immunodeficiency syndrome" OR<br>immunodeficiency ) AND ( TITLE-ABS-KEY (<br>sensitiv* OR diagnos* OR "predictive value" ) OR<br>TITLE-ABS ( accurac* ) ) AND ( LIMIT-TO (<br>LANGUAGE , "English" ) OR LIMIT-TO (<br>LANGUAGE , "Spanish" ) OR LIMIT-TO (<br>LANGUAGE , "Portuguese" ) )                                                                                                                                                                                                                                                                          | 2/20/19 | 1119 articles<br><br>- 1058<br>duplicates<br><br>= 61 articles |
| Cochrane<br>Library<br>1800-     | #1(histoplasmos* OR histoplasma):ti,ab,kw Limits<br>93<br>#2MeSH descriptor: [Histoplasmosis] explode all<br>treesMeSH 42<br>#3MeSH descriptor: [HIV] explode all treesMeSH<br>2896<br>#4MeSH descriptor: [Acquired Immunodeficiency<br>Syndrome] explode all treesMeSH 1709<br>#5( hiv OR "human immunodeficiency virus" OR<br>aids OR "acquired immunodeficiency syndrome"<br>OR immunodeficiency ):ti,ab,kw Limits 23558<br>#6(sensitiv* OR diagnos* OR "predictive<br>value"):ti,ab,kw Limits 201636<br>#7(accurac*):ti,abLimits 13660<br>#8#1 OR #2Limits 93<br>#9#5 OR #3 OR #4Limits 23558<br>#10#6 OR #7Limits 207398<br>#11#8 AND #9 AND #10Limits 7<br><br>Limits: English, Spanish, Portuguese | 2/20/19 | 7 articles<br><br>- 6 duplicates<br><br>= 1 article            |
| PubMed<br>Central (PMC)          | ((((((((histoplasmos*[Title] OR histoplasma[Title])))<br>OR (histoplasmos*[Abstract] OR                                                                                                                                                                                                                                                                                                                                                                                                                                                                                                                                                                                                                   | 2/20/19 | 49 articles                                                    |

|        |                                                                                                                                                                                                                                                                                                                                                                                                                                                                                                                                                                                                                                                                                                                                                                                                                                                                                                                                                                                                                                                                                                                                                                                                                                                                                                                                                                                                                                                                      |                                  |                                                                      |
|--------|----------------------------------------------------------------------------------------------------------------------------------------------------------------------------------------------------------------------------------------------------------------------------------------------------------------------------------------------------------------------------------------------------------------------------------------------------------------------------------------------------------------------------------------------------------------------------------------------------------------------------------------------------------------------------------------------------------------------------------------------------------------------------------------------------------------------------------------------------------------------------------------------------------------------------------------------------------------------------------------------------------------------------------------------------------------------------------------------------------------------------------------------------------------------------------------------------------------------------------------------------------------------------------------------------------------------------------------------------------------------------------------------------------------------------------------------------------------------|----------------------------------|----------------------------------------------------------------------|
| 2000-  | <p>histoplasma[Abstract])) OR "histoplasmosis"[MeSH Terms])) AND (((hiv [Title] OR "human immunodeficiency virus" [Title] OR aids [Title] OR "acquired immunodeficiency syndrome" [Title] OR immunodeficiency[Title])) OR (hiv [Abstract] OR "human immunodeficiency virus" [Abstract] OR aids [Abstract] OR "acquired immunodeficiency syndrome" [Abstract] OR immunodeficiency[Abstract])) OR ("hiv"[MeSH Terms] OR "acquired immunodeficiency syndrome"[MeSH Terms])) AND (((sensitiv*[Title] OR diagnos*[Title] OR "predictive value"[Title] OR accurac*[Title])) OR (sensitiv*[Abstract] OR diagnos*[Abstract] OR "predictive value"[Abstract] OR accurac*[Abstract])))) NOT (((((((histoplasmos*[Title] OR histoplasma[Title])) OR (histoplasmos*[Abstract] OR histoplasma[Abstract])) OR "histoplasmosis"[MeSH Terms])) AND (((hiv [Title] OR "human immunodeficiency virus" [Title] OR aids [Title] OR "acquired immunodeficiency syndrome" [Title] OR immunodeficiency[Title])) OR (hiv [Abstract] OR "human immunodeficiency virus" [Abstract] OR aids [Abstract] OR "acquired immunodeficiency syndrome" [Abstract] OR immunodeficiency[Abstract])) OR ("hiv"[MeSH Terms] OR "acquired immunodeficiency syndrome"[MeSH Terms])) AND (((sensitiv*[Title] OR diagnos*[Title] OR "predictive value"[Title] OR accurac*[Title])) OR (sensitiv*[Abstract] OR diagnos*[Abstract] OR "predictive value"[Abstract] OR accurac*[Abstract])))) AND medline[sb])</p> |                                  | <p>- 45<br/>duplicates</p> <p>= 4 articles</p>                       |
| LILACS | <p>(tw:(histoplasmos* OR histoplasma )) AND (tw:(hiv OR "human immunodeficiency virus" OR aids OR "acquired immunodeficiency syndrome" OR immunodeficiency )) AND (tw:(sensitiv* OR diagnos* OR "predictive value" OR accurac*)) AND (instance:"regional")</p> <p>Limits: LILACS, English, Spanish, Portuguese</p>                                                                                                                                                                                                                                                                                                                                                                                                                                                                                                                                                                                                                                                                                                                                                                                                                                                                                                                                                                                                                                                                                                                                                   | 2/20/19                          | <p>210 articles</p> <p>- 35<br/>duplicates</p> <p>= 175 articles</p> |
|        |                                                                                                                                                                                                                                                                                                                                                                                                                                                                                                                                                                                                                                                                                                                                                                                                                                                                                                                                                                                                                                                                                                                                                                                                                                                                                                                                                                                                                                                                      | <b>De-duplicated in EndNote:</b> | <b>2228 articles</b>                                                 |
